# Supplementary material for: Structural elucidation and hypoglycemic effect of an inulin-type fructan extracted from Stevia rebaudiana roots
Source: Royal Society of Chemistry journal article supplement (doi:10.1039/d2fo03687h), 2023-01-01
Supplement: d2fo03687h1.pdf [file d2fo03687h1.pdf]

*Supporting Information*

**Structural elucidation and hypoglycemic effect of an inulin-type fructan  
extracted from *Stevia rebaudiana* roots**

Zhiyan Tang,<sup>†a</sup> Taili Shao,<sup>†a,b</sup> Lan Gao,<sup>a</sup> Pingchuan Yuan,<sup>a,b</sup> Zhengrui Ren,<sup>a</sup> Lei Tian,<sup>a</sup>  
Wei Liu,<sup>a</sup> Chunyan Liu,<sup>a,b</sup> Xiuxian Xu,<sup>a</sup> Xuan Zhou,<sup>a</sup> Jun Han<sup>\*a,b</sup> and Guodong  
Wang<sup>\*a,b</sup>

*<sup>a</sup>Drug Research & Development Center, School of Pharmacy, Wannan Medical  
College, Wuhu 241002, China*

*<sup>b</sup>Anhui Provincial Engineering Research Center for Polysaccharide Drugs, Anhui  
Provincial Engineering Laboratory for Screening and Re-evaluation of Active  
Compounds of Herbal Medicines in Southern Anhui, Anhui Province Key Laboratory  
of Active Biological Macromolecules, Wuhu 241002, China*

\*Corresponding authors.

E-mails: hanjun@wnmc.edu.cn; wangguodong@wnmc.edu.cn.

<sup>†</sup>These authors contributed equally.

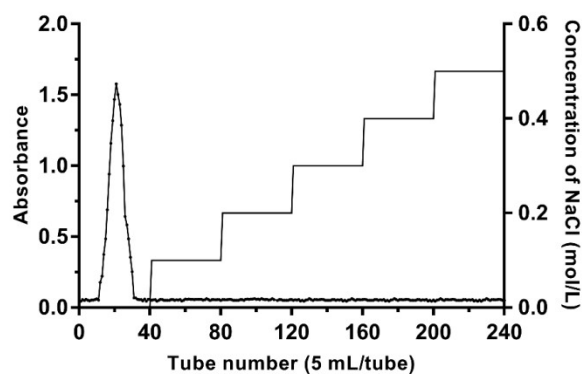

**Fig. S1** Elution profile obtained using the DEAE-Sepharose Fast Flow column.

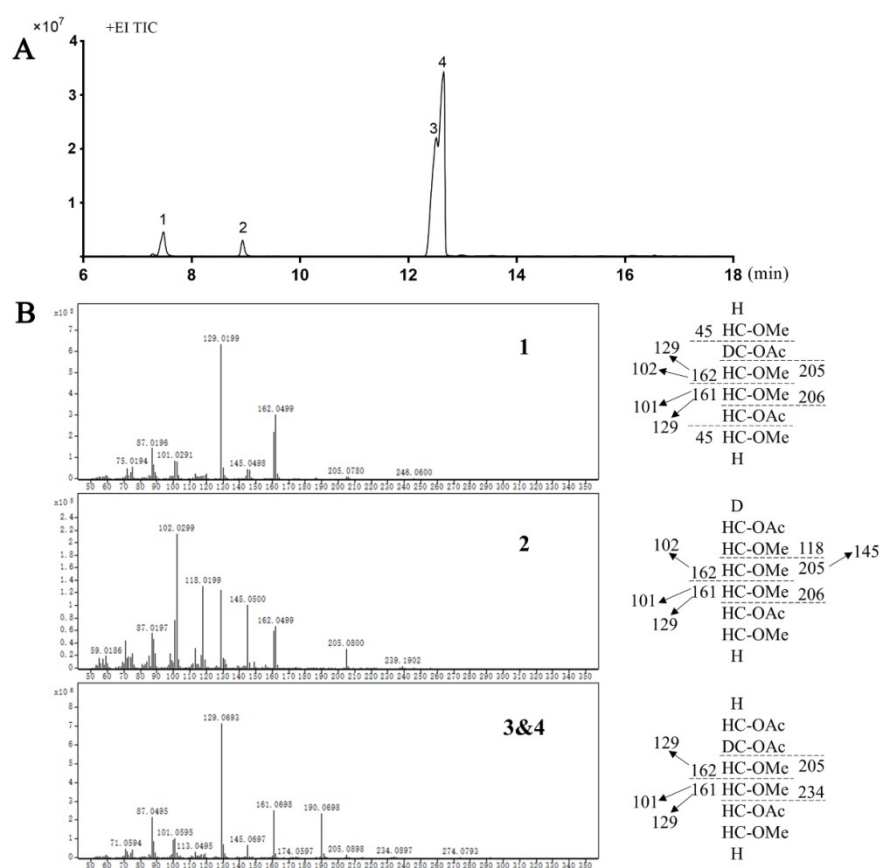

**Fig. S2** GC-MS profile of partially methylated alditol acetates of SRRP. (A) TIC profile and (B) MS fragments and deduced residues. Peaks: 1, 2,5-di-*O*-acetyl-(2-deuterio)-1,3,4,6-tetra-*O*-methyl hexitols (mannitol, glucitol); 2, 1,5-di-*O*-acetyl-(1-deuterio)-2,3,4,6-tetra-*O*-methyl glucitol; 3 and 4, 1,2,5-tri-*O*-acetyl-(2-deuterio)-3,4,6-tri-*O*-methyl hexitols (mannitol, glucitol).

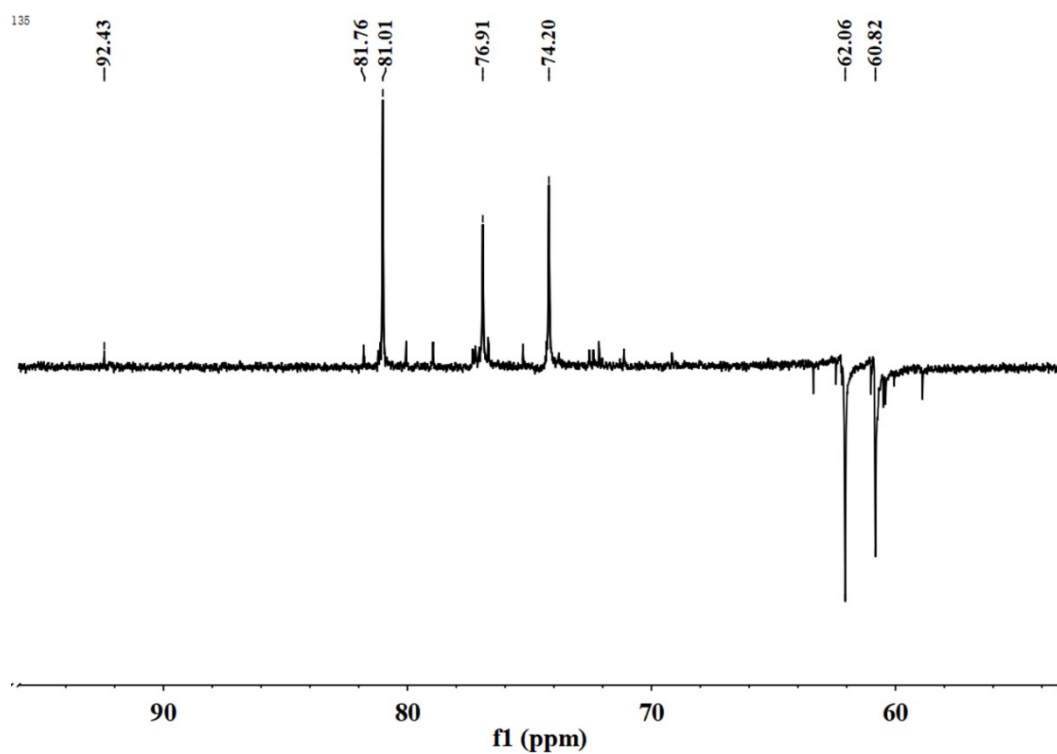

**Fig. S3** DEPT-135 NMR spectrum of SRRP.

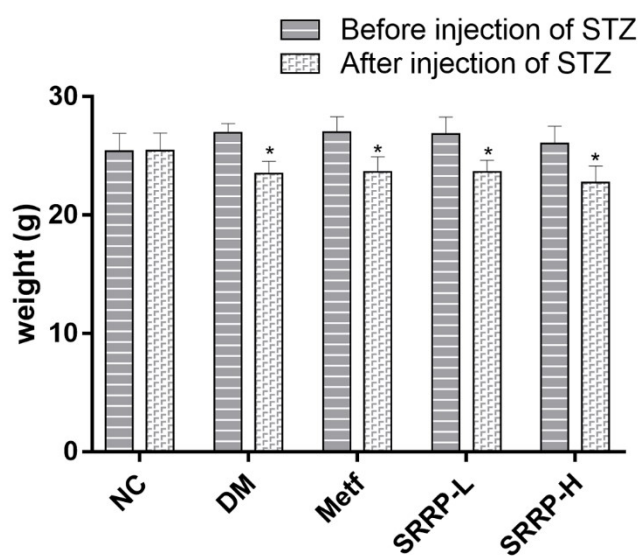

**Fig. S4** Body weight of mice in different groups. Data are expressed as means  $\pm$  SDs.

\*  $P < 0.05$ , comparison before and after STZ injection in each group.

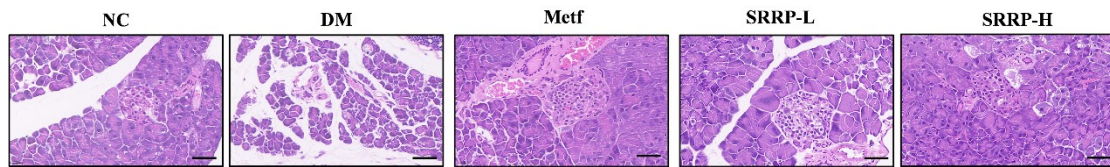

**Fig S5** Histopathological analysis of the pancreas: Pancreatic tissue sections of mice stained with hematoxylin-eosin (image magnification = 400×).

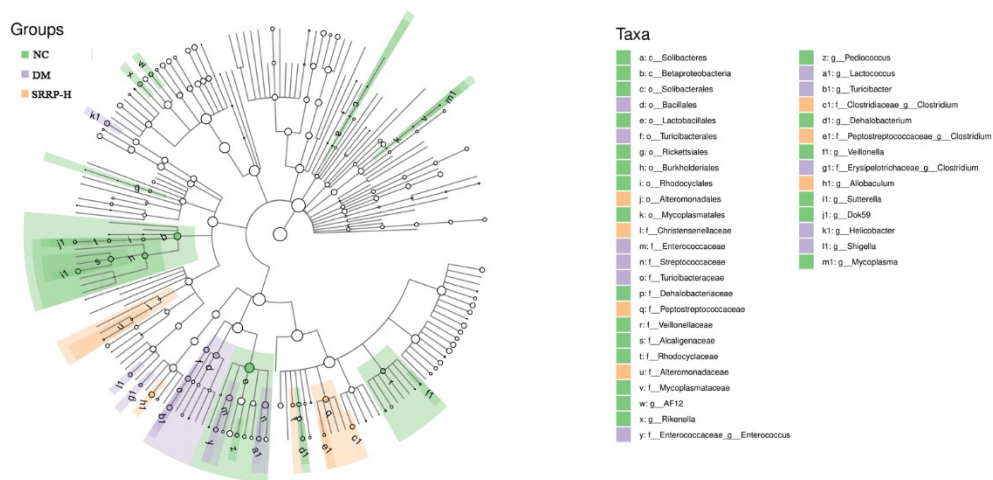

**Fig. S6** Taxonomic cladogram obtained by comparing the three groups using the linear discriminant analysis effect size method.
